# Supplementary material for: Fabrication of Surfactant-Dispersed HiPco Single-Walled Carbon Nanotube-Based Alginate Hydrogel Composites as Cellular Products
Source: MDPI journal article supplement (doi:10.3390/ijms20194802), 2019-09-27
Supplement: s1 [file s1]

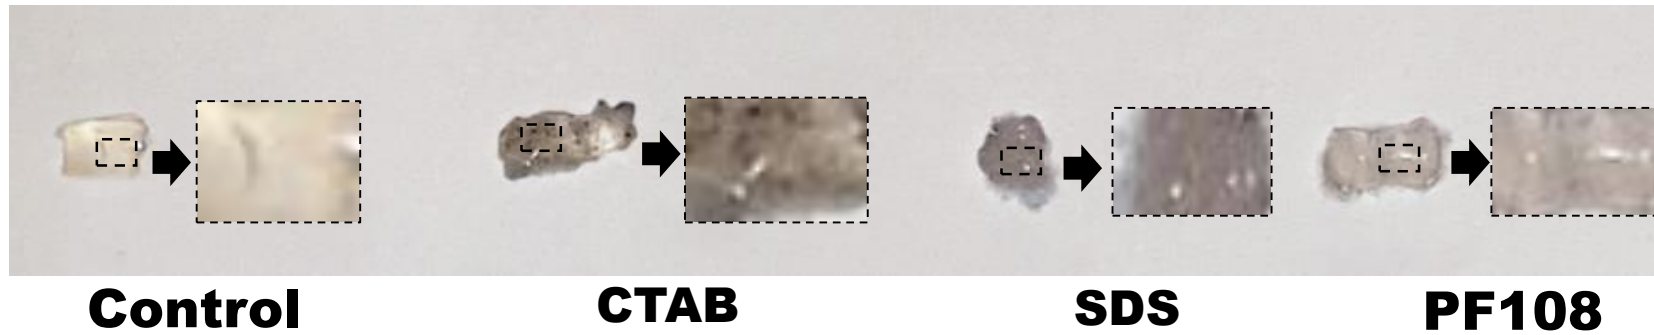

**Supplementary Figure 1. Representative images of control alginate gels (Control) and gels with SWCNT dispersed in CTAB, SDS and PF108 from left to right respectively.**

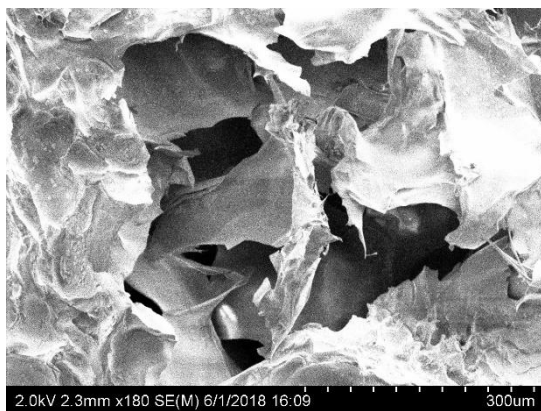

**Control**

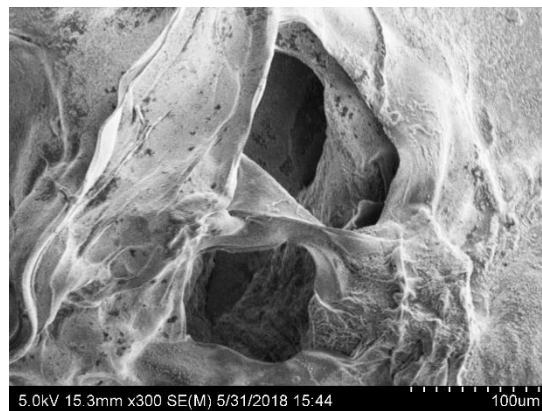

**CTAB**

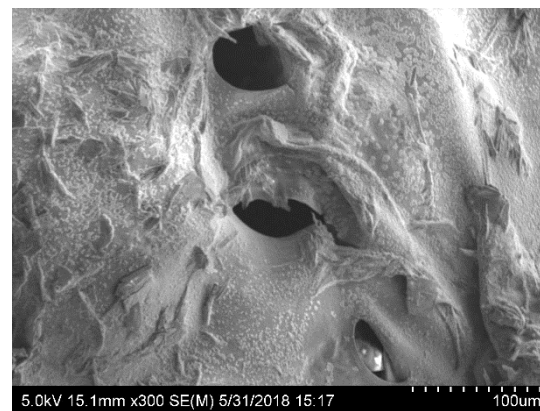

**SDS**

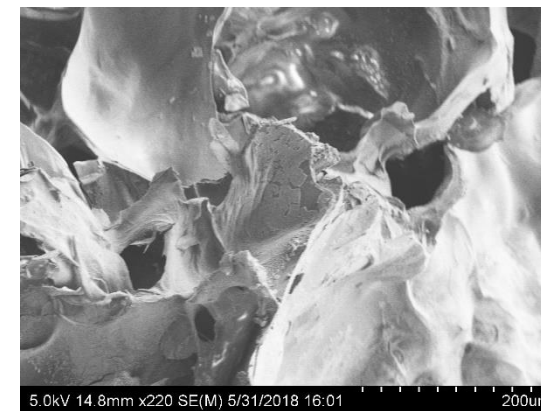

**PF108**

**Supplementary Figure 2. Characteristic SEM images**
